# Supplementary material for: Regulatory roles of natural antisense transcripts
Source: Springer Nature journal article supplement (doi:10.1038/nrm2738), 2009-07-29
Supplement: 41580_2009_BFnrm2738_MOESM1_ESM.pdf [file 41580_2009_BFnrm2738_MOESM1_ESM.pdf]

**Supplementary information S1 (table) | Reported antisense transcripts and their targets**

| Sense-antisense transcripts                                                                                                                      | Proposed function or disease relevance | Suggested mechanism                                               | Species  | Ref.             |
|--------------------------------------------------------------------------------------------------------------------------------------------------|----------------------------------------|-------------------------------------------------------------------|----------|------------------|
| BACE1 and BACE1-AS                                                                                                                               | Alzheimer's disease                    | Stability                                                         | H, M     | <sup>1</sup>     |
| APOE and APOE-AS1                                                                                                                                | Alzheimer's disease                    | Not known                                                         | H, M     | <sup>2</sup>     |
| PU.1 and PU.1-AS                                                                                                                                 | Haematopoiesis                         | Translational block                                               | H, M     | <sup>3</sup>     |
| $\Delta 5$ -desaturase and reverse $\Delta 5$ -desaturase                                                                                        | Fatty acid metabolism                  | Translational block, transcriptional interference, mRNA stability | H, R     | <sup>4</sup>     |
| P15 and P15-AS                                                                                                                                   | Tumour suppressor                      | Chromatin modification                                            | H        | <sup>5</sup>     |
| P21 and P21-AS                                                                                                                                   | Tumour Suppressor                      | Chromatin modification                                            | H        | <sup>6</sup>     |
| NKx2.2 and NKx2.2-AS                                                                                                                             | Neuronal cell differentiation          | Not known                                                         | H        | <sup>7</sup>     |
| Zfh-5 and zfh-5AS                                                                                                                                | Transcription factor                   | Not known                                                         | H, M     | <sup>8</sup>     |
| Progesteron receptor and PR-AS                                                                                                                   | PR activation / inhibition             | Promoter activation/inhibition through heterochromatin protein 1  | H        | <sup>9</sup>     |
| HAR1F and HAR1R                                                                                                                                  | Neuro-development                      | Not known                                                         | H        | <sup>10</sup>    |
| WT1 and WT1-AS                                                                                                                                   | Kidney development                     | Methylation                                                       | H, M     | <sup>11</sup>    |
| BDNF and BDNFOS                                                                                                                                  | Neurotrophic factor                    | RNA duplex formation                                              | P        | <sup>12,13</sup> |
| PINK1 and naPINK1                                                                                                                                | Mitochondrial function                 | Not known                                                         | H        | <sup>14</sup>    |
| FMR1 and ASFMR1                                                                                                                                  | Fragile X mental retardation           | Epigenetic changes                                                | H, M     | <sup>15,16</sup> |
| EPO-R and asEPO-R                                                                                                                                | Lung growth                            | Stability, translation                                            | H, C     | <sup>17</sup>    |
| Ghrelin and ghrelinOS                                                                                                                            | Anxiety, depression                    | Not known                                                         | H        | <sup>18</sup>    |
| Rad 18 and NAT-Rad18                                                                                                                             | Apoptosis                              | Post-transcriptional control                                      | H, R     | <sup>19</sup>    |
| HFE and HFE antisense RNA                                                                                                                        | Iron storage disorder                  | Translation repression                                            | H        | <sup>20</sup>    |
| Zeb2 and Zeb2 NAT                                                                                                                                | Epithelial-mesenchymal transition      | Splicing                                                          | H, M     | <sup>21,22</sup> |
| TSP1 and TSP1-AS                                                                                                                                 | Platelet aggregation                   | Not known                                                         | H        | <sup>23</sup>    |
| Urocortin, Ucn and Ucn-AS                                                                                                                        | Neuro-transmission                     | Post-transcriptional                                              | R        | <sup>24</sup>    |
| Sphk1 and Khps1                                                                                                                                  | Calcium mobilization                   | Demethylation                                                     | H, R     | <sup>25</sup>    |
| Pdcd2 and Tbp                                                                                                                                    | Apoptosis                              | Editing, alternative splicing and polyadenylation                 | H, M, Ch | <sup>26</sup>    |
| Msh4 and Hspa5                                                                                                                                   | Meiotic DNA recombination              | RNA degradation                                                   | M        | <sup>27</sup>    |
| Pax6 and Pax6OS<br>Pax2 and Pax2OS<br>Six3 and Six3OS<br>Six6 and Six6OS<br>Otx2 and Otx2OS<br>Crx and CrxOS<br>Rax and RaxOS<br>Vax2 and Vax2OS | Eye development                        | Not known                                                         | M, H     | <sup>28</sup>    |

|                                                    |                                                      |                                                          |         |       |
|----------------------------------------------------|------------------------------------------------------|----------------------------------------------------------|---------|-------|
| Hyaluronan synthase 2 and HASNT                    | Hyaluronan biosynthesis                              | Not known                                                | M, H    | 29    |
| Msx1 and Msx1_AS                                   | Skeletal terminal differentiation                    | Splicing, imprinting                                     | R, H    | 30    |
| FGF-2 and FGF-AS (bFGF and bFGF-AS)                | Haematological tumours, endometriosis                | Polyadenylation, translational block, editing, stability | Mm      | 31-34 |
| p53                                                | Differentiation                                      | Transport                                                | M       | 35    |
| N-myc                                              | Oncogenesis                                          | Splicing                                                 | M, H    | 36    |
| Tsix and Xist                                      | X chromosome inactivation                            | X inactivation                                           | Mm      | 37    |
| HIF-1 $\alpha$ and aHIF                            | Poor prognosis marker in breast cancer, renal cancer | RNA destabilization, pre-mRNA splicing                   | H, R    | 38    |
| Survivin and EPR-1                                 | Colon cancer                                         | Not known                                                | H       | 39    |
| $\alpha$ -globulin and LUC7L                       | $\alpha$ -Thalassaemia                               | Methylation                                              | H       | 40    |
| IGF2R and Air                                      | Tumour suppressor                                    | Imprinting                                               | H, M    | 41,42 |
| KvLQT1                                             | Beckwith-Wiedemann syndrome                          | Imprinting                                               | H       | 43    |
| SNURF-SNRPN and UBE3A                              | Prader-Willi and Angelman syndrome                   | Imprinting                                               | H       | 44    |
| GNAS                                               | Signal transduction                                  | Imprinting                                               | H, M    | 45    |
| BCMA and BCMA-AS RNA                               | B-cell maturation                                    | Translation block, editing                               | H       | 46,47 |
| Bcl-2 and IgH                                      | Follicular B-cell lymphoma                           | RNA stabilization                                        | H       | 48    |
| c-erbA and Rev-ErbA $\alpha$                       | Thyroid hormone receptor                             | Splicing                                                 | H, R    | 49-51 |
| Thymidylate synthase and rTS $\alpha$              | DNA replication and repair                           | Editing                                                  | H       | 52    |
| CHRNA3 and CHRNA5                                  | Neuronal nicotinic receptor                          | Stabilization                                            | H, B    | 53    |
| Myelin basic protein (MBP and MBP-AS)              | Myelin formation                                     | Transport                                                | M       | 54    |
| eNOS and NOS3AS (sONE)                             | Vascular disease                                     | Inverse S-AS correlation                                 | H, M    | 55    |
| Neuronal nitric oxide synthase and NOS             | Nervous system signalling                            | Post-transcriptional, translation                        | S, H, R | 56    |
| Inducible nitric oxide synthase (iNOS and iNOS AS) | Inflammatory diseases                                | Stability                                                | R       | 57    |
| NOS2A and anti-NOS2A                               | Neuronal differentiation                             | Inverse S-AS correlation                                 | P       | 58    |
| SMAD5 and DAMS                                     | TGF- $\beta$ /BMP inhibitory signals                 | Transcriptional interference, translational block        | H, R    | 59    |
| eIF2 $\alpha$                                      | T cell mitogenesis                                   | RNA degradation                                          | H       | 60    |
| ERCC-1, RAF49 (ASE-1)                              | DNA repair                                           | Stability, localization                                  | H       | 61    |
| $\alpha$ 1 collagen                                | Chondrogenesis                                       | Competitive transcriptional interference                 | Ch      | 62    |
| MKRN2 and RAF1                                     | Cancer                                               | Polyadenylation                                          | Mm      | 63    |
| Hoxa 11                                            | Development                                          | Epigenetic                                               | Mm      | 64    |
| Cardiac troponin 1                                 | Myocardial function                                  | Translation                                              | H, R    | 65    |
| pMCH and pMCH antisense                            | Food intake                                          | Splicing                                                 | H, R    | 66,67 |
| CDYL and CDYL-AS                                   | Spermatogenesis                                      | Not known                                                | B       | 68    |

|                                                                    |                                                              |                                                          |      |       |
|--------------------------------------------------------------------|--------------------------------------------------------------|----------------------------------------------------------|------|-------|
| FGFR-3 and psiFGFR-3                                               | Bone and haematopoietic maturation                           | RNA degradation, translation inhibition                  | M    | 69    |
| TOP1 and TOP1-AS                                                   | Cell cycle                                                   | Translational regulation                                 | H    | 70    |
| EP1 prostanoid receptor and PKN protein kinase                     | Intracellular signalling                                     | Not known                                                | M    | 71    |
| EMX2 and EMX2OS                                                    | Development                                                  | Splicing, polyadenylation                                | H, M | 72    |
| Thymidine kinase and TK-AS                                         | Cell cycle                                                   | Inverse S-AS correlation                                 | M    | 73    |
| DIPLA1 and DIPAS                                                   | Placenta specific                                            | Not known                                                | H    | 74    |
| GnRH and SH                                                        | Gonadotropin-releasing hormone (GnRH)                        | Not known                                                | R    | 75    |
| HLA-J cluster<br>HZFw and HZFc<br>HZFw and HCGV<br>HTEX6 and HTEX4 | MHC class I                                                  | Alternative splicing, alternative polyadenylation        | H, M | 76    |
| MHC IIa, IIx, IIb and antisense aII, xII, bII                      | Skeletal muscle myosin heavy chain regulation                | Transcriptional interference and/or promoter methylation | R    | 77    |
| Cardiac $\alpha$ MHC and AS- $\alpha$ MHC                          | Cardiac myosin heavy chain $\alpha$ - $\beta$ gene switching | Transcriptional regulation at promoter                   | H, R | 78    |
| ABO and ABOAS                                                      | Blood group, ABO gene expression                             | Post-transcriptional, methylation                        | H    | 79    |
| Frequency, <i>frq</i> and antisense- <i>frq</i>                    | Circadian clock function                                     | Inverse S-AS correlation                                 | F    | 80    |
| ORCTL2 and ORCTL2S                                                 | Wilm's tumour                                                | Imprinting                                               | H    | 81    |
| Tenascin-X and P450c21B                                            | Adrenal function                                             | Post-transcriptional                                     | H    | 82    |
| NPT and NPT-AS                                                     | Na/Pi co-transporter, Phosphate homeostasis                  | Translation interference                                 | M, Z | 83    |
| PKN and EP1                                                        | Protein kinase                                               | Alternative polyadenylation                              | M    | 71    |
| COX10 and C17ORF1                                                  | Charcot-Marie-Tooth                                          | Post-transcriptional                                     | H    | 84    |
| c-myc and c-myc-antisense                                          | Oncogene                                                     | Pre-mRNA processing, transcription interference          | R, H | 85,86 |

Species: B, bovine; C, canine; Ch, chicken; F, fungus; H, human; M, mice; Mm, mammals; P, primate; R, rat or rodent; S, snail; Z, zebrafish.

1. Faghihi, M.A. et al. Expression of a noncoding RNA is elevated in Alzheimer's disease and drives rapid feed-forward regulation of beta-secretase. *Nat Med* **14**, 723-30 (2008).
2. Seitz, A. et al. Sense and antisense transcripts of the apolipoprotein E gene in normal and ApoE knockout mice, their expression after spinal cord injury and corresponding human transcripts. *Hum Mol Genet* **14**, 2661-70 (2005).
3. Ebralidze, A.K. et al. PU.1 expression is modulated by the balance of functional sense and antisense RNAs regulated by a shared cis-regulatory element. *Genes Dev* **22**, 2085-92 (2008).

4. Dreesen, T.D. et al. A newly discovered member of the fatty acid desaturase gene family: a non-coding, antisense RNA gene to delta5-desaturase. *Prostaglandins Leukot Essent Fatty Acids* **75**, 97-106 (2006).
5. Yu, W. et al. Epigenetic silencing of tumour suppressor gene p15 by its antisense RNA. *Nature* **451**, 202-6 (2008).
6. Morris, K.V., Santoso, S., Turner, A.M., Pastori, C. & Hawkins, P.G. Bidirectional transcription directs both transcriptional gene activation and suppression in human cells. *PLoS Genet* **4**, e1000258 (2008).
7. Tochitani, S. & Hayashizaki, Y. Nkx2.2 antisense RNA overexpression enhanced oligodendrocytic differentiation. *Biochem Biophys Res Commun* **372**, 691-6 (2008).
8. Komine, Y., Nakamura, K., Katsuki, M. & Yamamori, T. Novel transcription factor zfh-5 is negatively regulated by its own antisense RNA in mouse brain. *Mol Cell Neurosci* **31**, 273-83 (2006).
9. Schwartz, J.C. et al. Antisense transcripts are targets for activating small RNAs. *Nat Struct Mol Biol* **15**, 842-8 (2008).
10. Pollard, K.S. et al. An RNA gene expressed during cortical development evolved rapidly in humans. *Nature* **443**, 167-72 (2006).
11. Dallosso, A.R. et al. Alternately spliced WT1 antisense transcripts interact with WT1 sense RNA and show epigenetic and splicing defects in cancer. *Rna* **13**, 2287-99 (2007).
12. Liu, Q.R. et al. Rodent BDNF genes, novel promoters, novel splice variants, and regulation by cocaine. *Brain Res* **1067**, 1-12 (2006).
13. Pruunsild, P., Kazantseva, A., Aid, T., Palm, K. & Timmusk, T. Dissecting the human BDNF locus: bidirectional transcription, complex splicing, and multiple promoters. *Genomics* **90**, 397-406 (2007).
14. Scheele, C. et al. The human PINK1 locus is regulated in vivo by a non-coding natural antisense RNA during modulation of mitochondrial function. *BMC Genomics* **8**, 74 (2007).
15. Ladd, P.D. et al. An antisense transcript spanning the CGG repeat region of FMR1 is upregulated in premutation carriers but silenced in full mutation individuals. *Hum Mol Genet* **16**, 3174-87 (2007).
16. Khalil, A.M., Faghihi, M.A., Modarresi, F., Brothers, S.P. & Wahlestedt, C. A novel RNA transcript with antiapoptotic function is silenced in fragile x syndrome. *PLoS ONE* **3**, e1486 (2008).
17. Zhang, Q., Zhang, J., Moe, O.W. & Hsia, C.C. Synergistic upregulation of erythropoietin receptor (EPO-R) expression by sense and antisense EPO-R transcripts in the canine lung. *Proc Natl Acad Sci U S A* **105**, 7612-7 (2008).
18. Seim, I., Collet, C., Herington, A.C. & Chopin, L.K. Revised genomic structure of the human ghrelin gene and identification of novel exons, alternative splice variants and natural antisense transcripts. *BMC Genomics* **8**, 298 (2007).
19. Parenti, R., Paratore, S., Torrisi, A. & Cavallaro, S. A natural antisense transcript against Rad18, specifically expressed in neurons and upregulated during beta-amyloid-induced apoptosis. *Eur J Neurosci* **26**, 2444-57 (2007).
20. Thenie, A.C. et al. Identification of an endogenous RNA transcribed from the antisense strand of the HFE gene. *Hum Mol Genet* **10**, 1859-66 (2001).
21. Beltran, M. et al. A natural antisense transcript regulates Zeb2/Sip1 gene expression during Snail1-induced epithelial-mesenchymal transition. *Genes Dev* **22**, 756-69 (2008).
22. Nelles, L., Van de Putte, T., van Grunsven, L., Huylebroeck, D. & Verschuere, K. Organization of the mouse Zfh1b gene encoding the two-handed zinc finger repressor Smad-interacting protein-1. *Genomics* **82**, 460-9 (2003).
23. Ye, G.M. et al. Human THROMBOSPONDIN-1 gene contains a natural antisense transcript, and characterization of its expression in human multiple tissues and cells. *DNA Seq* **16**, 295-9 (2005).

24. Haeger, P. et al. Natural expression of immature Ucn antisense RNA in the rat brain. Evidence favoring bidirectional transcription of the Ucn gene locus. *Brain Res Mol Brain Res* **139**, 115-28 (2005).
25. Imamura, T. et al. Non-coding RNA directed DNA demethylation of Sphk1 CpG island. *Biochem Biophys Res Commun* **322**, 593-600 (2004).
26. Mihola, O., Forejt, J. & Trachtulec, Z. Conserved alternative and antisense transcripts at the programmed cell death 2 locus. *BMC Genomics* **8**, 20 (2007).
27. Hirano, M. & Noda, T. Genomic organization of the mouse Msh4 gene producing bicistronic, chimeric and antisense mRNA. *Gene* **342**, 165-77 (2004).
28. Alfano, G. et al. Natural antisense transcripts associated with genes involved in eye development. *Hum Mol Genet* **14**, 913-23 (2005).
29. Chao, H. & Spicer, A.P. Natural antisense mRNAs to hyaluronan synthase 2 inhibit hyaluronan biosynthesis and cell proliferation. *J Biol Chem* **280**, 27513-22 (2005).
30. Blin-Wakkach, C. et al. Endogenous Msx1 antisense transcript: in vivo and in vitro evidences, structure, and potential involvement in skeleton development in mammals. *Proc Natl Acad Sci U S A* **98**, 7336-41 (2001).
31. Volk, R., Koster, M., Potting, A., Hartmann, L. & Knochel, W. An antisense transcript from the *Xenopus laevis* bFGF gene coding for an evolutionarily conserved 24 kd protein. *Embo J* **8**, 2983-8 (1989).
32. Zuniga Mejia Borja, A., Meijers, C. & Zeller, R. Expression of alternatively spliced bFGF first coding exons and antisense mRNAs during chicken embryogenesis. *Dev Biol* **157**, 110-8 (1993).
33. Li, A.W. & Murphy, P.R. Expression of alternatively spliced FGF-2 antisense RNA transcripts in the central nervous system: regulation of FGF-2 mRNA translation. *Mol Cell Endocrinol* **162**, 69-78 (2000).
34. Kimelman, D. & Kirschner, M.W. An antisense mRNA directs the covalent modification of the transcript encoding fibroblast growth factor in *Xenopus* oocytes. *Cell* **59**, 687-96 (1989).
35. Khochbin, S., Brocard, M.P., Grunwald, D. & Lawrence, J.J. Antisense RNA and p53 regulation in induced murine cell differentiation. *Ann N Y Acad Sci* **660**, 77-87 (1992).
36. Krystal, G.W., Armstrong, B.C. & Battey, J.F. N-myc mRNA forms an RNA-RNA duplex with endogenous antisense transcripts. *Mol Cell Biol* **10**, 4180-91 (1990).
37. Nesterova, T.B. et al. Xist expression and macroH2A1.2 localisation in mouse primordial and pluripotent embryonic germ cells. *Differentiation* **69**, 216-25 (2002).
38. Thrash-Bingham, C.A. & Tartof, K.D. aHIF: a natural antisense transcript overexpressed in human renal cancer and during hypoxia. *J Natl Cancer Inst* **91**, 143-51 (1999).
39. Yamamoto, T., Manome, Y., Nakamura, M. & Tanigawa, N. Downregulation of survivin expression by induction of the effector cell protease receptor-1 reduces tumor growth potential and results in an increased sensitivity to anticancer agents in human colon cancer. *Eur J Cancer* **38**, 2316-24 (2002).
40. Tufarelli, C. et al. Transcription of antisense RNA leading to gene silencing and methylation as a novel cause of human genetic disease. *Nat Genet* **34**, 157-65 (2003).
41. Wutz, A. et al. Imprinted expression of the *Igf2r* gene depends on an intronic CpG island. *Nature* **389**, 745-9 (1997).
42. Moore, T. et al. Multiple imprinted sense and antisense transcripts, differential methylation and tandem repeats in a putative imprinting control region upstream of mouse *Igf2*. *Proc Natl Acad Sci U S A* **94**, 12509-14 (1997).
43. Smilnich, N.J. et al. A maternally methylated CpG island in *KvLQT1* is associated with an antisense paternal transcript and loss of imprinting in Beckwith-Wiedemann syndrome. *Proc Natl Acad Sci U S A* **96**, 8064-9 (1999).



44. Rougeulle, C., Cardoso, C., Fontes, M., Colleaux, L. & Lalande, M. An imprinted antisense RNA overlaps UBE3A and a second maternally expressed transcript. *Nat Genet* **19**, 15-6 (1998).
45. Hayward, B.E. & Bonthron, D.T. An imprinted antisense transcript at the human GNAS1 locus. *Hum Mol Genet* **9**, 835-41 (2000).
46. Laabi, Y. et al. The BCMA gene, preferentially expressed during B lymphoid maturation, is bidirectionally transcribed. *Nucleic Acids Res* **22**, 1147-54 (1994).
47. Hatzoglou, A. et al. Natural antisense RNA inhibits the expression of BCMA, a tumour necrosis factor receptor homologue. *BMC Mol Biol* **3**, 4 (2002).
48. Capaccioli, S. et al. A bcl-2/IgH antisense transcript deregulates bcl-2 gene expression in human follicular lymphoma t(14;18) cell lines. *Oncogene* **13**, 105-15 (1996).
49. Munroe, S.H. & Lazar, M.A. Inhibition of c-erbA mRNA splicing by a naturally occurring antisense RNA. *J Biol Chem* **266**, 22083-6 (1991).
50. Hastings, M.L., Milcarek, C., Martincic, K., Peterson, M.L. & Munroe, S.H. Expression of the thyroid hormone receptor gene, erbAalpha, in B lymphocytes: alternative mRNA processing is independent of differentiation but correlates with antisense RNA levels. *Nucleic Acids Res* **25**, 4296-300 (1997).
51. Miyajima, N. et al. Two erbA homologs encoding proteins with different T3 binding capacities are transcribed from opposite DNA strands of the same genetic locus. *Cell* **57**, 31-9 (1989).
52. Dolnick, B.J. Cloning and characterization of a naturally occurring antisense RNA to human thymidylate synthase mRNA. *Nucleic Acids Res* **21**, 1747-52 (1993).
53. Solda, G. et al. In vivo RNA-RNA duplexes from human alpha3 and alpha5 nicotinic receptor subunit mRNAs. *Gene* **345**, 155-64 (2005).
54. Okano, H., Aruga, J., Nakagawa, T., Shiota, C. & Mikoshiba, K. Myelin basic protein gene and the function of antisense RNA in its repression in myelin-deficient mutant mouse. *J Neurochem* **56**, 560-7 (1991).
55. Fish, J.E. et al. Hypoxia-inducible expression of a natural cis-antisense transcript inhibits endothelial nitric-oxide synthase. *J Biol Chem* **282**, 15652-66 (2007).
56. Korneev, S.A., Park, J.H. & O'Shea, M. Neuronal expression of neural nitric oxide synthase (nNOS) protein is suppressed by an antisense RNA transcribed from an NOS pseudogene. *J Neurosci* **19**, 7711-20 (1999).
57. Matsui, K. et al. Natural antisense transcript stabilizes inducible nitric oxide synthase messenger RNA in rat hepatocytes. *Hepatology* **47**, 686-97 (2008).
58. Korneev, S.A. et al. Novel noncoding antisense RNA transcribed from human anti-NOS2A locus is differentially regulated during neuronal differentiation of embryonic stem cells. *Rna* **14**, 2030-7 (2008).
59. Zavadil, J., Svoboda, P., Liang, H., Kottickal, L.V. & Nagarajan, L. An antisense transcript to SMAD5 expressed in fetal and tumor tissues. *Biochem Biophys Res Commun* **255**, 668-72 (1999).
60. Silverman, T.A., Noguchi, M. & Safer, B. Role of sequences within the first intron in the regulation of expression of eukaryotic initiation factor 2 alpha. *J Biol Chem* **267**, 9738-42 (1992).
61. van Duin, M. et al. Conserved pattern of antisense overlapping transcription in the homologous human ERCC-1 and yeast RAD10 DNA repair gene regions. *Mol Cell Biol* **9**, 1794-8 (1989).
62. Farrell, C.M. & Lukens, L.N. Naturally occurring antisense transcripts are present in chick embryo chondrocytes simultaneously with the down-regulation of the alpha 1 (I) collagen gene. *J Biol Chem* **270**, 3400-8 (1995).
63. Gray, T.A. et al. Phylogenetic conservation of the makorin-2 gene, encoding a multiple zinc-finger protein, antisense to the RAF1 proto-oncogene. *Genomics* **77**, 119-26 (2001).

64. Potter, S.S. & Branford, W.W. Evolutionary conservation and tissue-specific processing of Hoxa 11 antisense transcripts. *Mamm Genome* **9**, 799-806 (1998).
65. Podlowski, S., Bramlage, P., Baumann, G., Morano, I. & Luther, H.P. Cardiac troponin I sense-antisense RNA duplexes in the myocardium. *J Cell Biochem* **85**, 198-207 (2002).
66. Hervieu, G. & Nahon, J.L. Pro-melanin concentrating hormone messenger ribonucleic acid and peptides expression in peripheral tissues of the rat. *Neuroendocrinology* **61**, 348-64 (1995).
67. Miller, C.L., Burmeister, M. & Thompson, R.C. Antisense expression of the human pro-melanin-concentrating hormone genes. *Brain Res* **803**, 86-94 (1998).
68. Wang, A. et al. Molecular characterization of the bovine chromodomain Y-like genes. *Anim Genet* **39**, 207-16 (2008).
69. Weil, D., Power, M.A., Webb, G.C. & Li, C.L. Antisense transcription of a murine FGFR-3 pseudogene during fetal development. *Gene* **187**, 115-22 (1997).
70. Zhou, B.S., Beidler, D.R. & Cheng, Y.C. Identification of antisense RNA transcripts from a human DNA topoisomerase I pseudogene. *Cancer Res* **52**, 4280-5 (1992).
71. Batshake, B. & Sundelin, J. The mouse genes for the EP1 prostanoid receptor and the PKN protein kinase overlap. *Biochem Biophys Res Commun* **227**, 70-6 (1996).
72. Noonan, F.C., Goodfellow, P.J., Staloch, L.J., Mutch, D.G. & Simon, T.C. Antisense transcripts at the EMX2 locus in human and mouse. *Genomics* **81**, 58-66 (2003).
73. Sutterluety, H. et al. Growth-regulated antisense transcription of the mouse thymidine kinase gene. *Nucleic Acids Res* **26**, 4989-95 (1998).
74. Garcia, J. & Castrillo, J.L. Identification of two novel human genes, DIPLA1 and DIPAS, expressed in placenta tissue. *Gene* **344**, 241-50 (2005).
75. Adelman, J.P., Bond, C.T., Douglass, J. & Herbert, E. Two mammalian genes transcribed from opposite strands of the same DNA locus. *Science* **235**, 1514-7 (1987).
76. Coriton, O., Lepourcelet, M., Hampe, A., Galibert, F. & Mosser, J. Transcriptional analysis of the 69-kb sequence centromeric to HLA-J: a dense and complex structure of five genes. *Mamm Genome* **11**, 1127-31 (2000).
77. Pandorf, C.E. et al. Dynamics of myosin heavy chain gene regulation in slow skeletal muscle: role of natural antisense RNA. *J Biol Chem* **281**, 38330-42 (2006).
78. Haddad, F., Bodell, P.W., Qin, A.X., Giger, J.M. & Baldwin, K.M. Role of antisense RNA in coordinating cardiac myosin heavy chain gene switching. *J Biol Chem* **278**, 37132-8 (2003).
79. Hata, Y., Kominato, Y. & Takizawa, H. Identification and characterization of a novel antisense RNA transcribed from the opposite strand of the human blood group ABO gene. *Transfusion* **47**, 842-51 (2007).
80. Kramer, C., Loros, J.J., Dunlap, J.C. & Crosthwaite, S.K. Role for antisense RNA in regulating circadian clock function in *Neurospora crassa*. *Nature* **421**, 948-52 (2003).
81. Cooper, P.R. et al. Divergently transcribed overlapping genes expressed in liver and kidney and located in the 11p15.5 imprinted domain. *Genomics* **49**, 38-51 (1998).
82. Bristow, J., Tee, M.K., Gitelman, S.E., Mellon, S.H. & Miller, W.L. Tenascin-X: a novel extracellular matrix protein encoded by the human XB gene overlapping P450c21B. *J Cell Biol* **122**, 265-78 (1993).
83. Werner, A., Preston-Fayers, K., Dehmelt, L. & Nalbant, P. Regulation of the NPT gene by a naturally occurring antisense transcript. *Cell Biochem Biophys* **36**, 241-52 (2002).

84. Kennerson, M.L. et al. The Charcot-Marie-Tooth binary repeat contains a gene transcribed from the opposite strand of a partially duplicated region of the COX10 gene. *Genomics* **46**, 61-9 (1997).
85. Nepveu, A. & Marcu, K.B. Intragenic pausing and anti-sense transcription within the murine *c-myc* locus. *Embo J* **5**, 2859-65 (1986).
86. Shliakhova, L.N., Itkes, A.V., Chernov, B.K. & Kiselev, L.L. [Transcription of antisense RNA for the human *c-myc* gene]. *Mol Biol (Mosk)* **28**, 909-17 (1994).
