# Supplementary material for: Regulatory roles of natural antisense transcripts
Source: Springer Nature journal article supplement (doi:10.1038/nrm2738), 2009-07-29
Supplement: 41580_2009_BFnrm2738_MOESM3_ESM.pdf [file 41580_2009_BFnrm2738_MOESM3_ESM.pdf]

**Supplementary information S3 (box) | Natural antisense transcripts in genomic imprinting**

There are several studies suggesting a pivotal role for antisense transcripts in imprinted genes, such as IGF2R<sup>1</sup>, KCNQ1<sup>2</sup>, UBE3A<sup>3</sup>, ATP10C, MKRN3, MAGEL2, NDN<sup>4</sup>, Slc22a2, Slc22a3<sup>5</sup>, GNAS<sup>6</sup> and Gnas<sup>7</sup>.

***Kcnq1ot1* transcript:** The antisense RNA, *Kcnq1ot1*, is essential for the silencing activity of the *Kcnq1* imprinting control region, which in turn controls imprinting of a cluster of neighbouring genes on chromosome 11. Antisense transcript appears to recruit repressor complexes, turning chromatin into an inactive state<sup>8</sup>. Suppressive chromatin modifications are spreading in both direction to the neighbouring genes, similar to the X chromosome inactivation but with a limited penetrance<sup>9</sup>. *Kcnq1ot1* antisense RNA was shown to be involved in both the establishment of transcriptional silencing as well as in maintenance of silencing through subsequent cell divisions<sup>10</sup>.

***Air* transcript:** A region that contains three imprinted, maternally expressed protein-coding genes (*Igf2r/Slc22a2/Slc22a3*) on chromosome 6 has been shown to be controlled by a paternally expressed noncoding *Air* RNA<sup>5</sup>. Expression of *Air* (named *Air*, for antisense *Igf2r* RNA) correlates with repression of all three genes<sup>11</sup>. *Air* is a 108-kb unspliced and repeat-rich transcript, overlaps with just one of these genes in an antisense orientation<sup>12</sup>. However, *Air* is required for silencing of all three genes, which is likely through a similar mechanism shown for the *Kcnq1* imprinted locus.

***UBE3A-ATS* transcript:** In the case of ubiquitin ligase E3A (*UBE3A*), natural antisense transcript *UBE3A-ATS* is a very long (460-kb), spliced noncoding RNA encoded on chromosome 15. Paternal expression of *UBE3A-ATS* is responsible for monoallelic (maternal) expression of the *UBE3A* gene in the brain<sup>3,13,14</sup>. *UBE3A-ATS* lies within a highly complex locus containing several other imprinted genes including *ATP10C* and *UBE3A*, both show genomic imprinting<sup>15,16</sup>.

1. Wutz, A. et al. Imprinted expression of the *Igf2r* gene depends on an intronic CpG island. *Nature* **389**, 745-9 (1997).
2. Smilnich, N.J. et al. A maternally methylated CpG island in *KvLQT1* is associated with an antisense paternal transcript and loss of imprinting in Beckwith-Wiedemann syndrome. *Proc Natl Acad Sci U S A* **96**, 8064-9 (1999).
3. Rougeulle, C., Cardoso, C., Fontes, M., Colleaux, L. & Lalande, M. An imprinted antisense RNA overlaps *UBE3A* and a second maternally expressed transcript. *Nat Genet* **19**, 15-6 (1998).
4. Runte, M. et al. The IC-SNURF-SNRPN transcript serves as a host for multiple small nucleolar RNA species and as an antisense RNA for *UBE3A*. *Hum Mol Genet* **10**, 2687-700 (2001).
5. Sleutels, F., Zwart, R. & Barlow, D.P. The non-coding *Air* RNA is required for silencing autosomal imprinted genes. *Nature* **415**, 810-3 (2002).
6. Hayward, B.E. & Bonthron, D.T. An imprinted antisense transcript at the human *GNAS1* locus. *Hum Mol Genet* **9**, 835-41 (2000).
7. Wroe, S.F. et al. An imprinted transcript, antisense to *Nesp*, adds complexity to the cluster of imprinted genes at the mouse *Gnas* locus. *Proc Natl Acad Sci U S A* **97**, 3342-6 (2000).

8. Thakur, N. et al. An antisense RNA regulates the bidirectional silencing property of the Kcnq1 imprinting control region. *Mol Cell Biol* **24**, 7855-62 (2004).
9. Kanduri, C. Functional insights into long antisense noncoding RNA Kcnq1ot1 mediated bidirectional silencing. *RNA Biol* **5**(2008).
10. Pandey, R.R. et al. Kcnq1ot1 antisense noncoding RNA mediates lineage-specific transcriptional silencing through chromatin-level regulation. *Mol Cell* **32**, 232-46 (2008).
11. Lyle, R. et al. The imprinted antisense RNA at the Igf2r locus overlaps but does not imprint Mas1. *Nat Genet* **25**, 19-21 (2000).
12. Zwart, R., Sleutels, F., Wutz, A., Schinkel, A.H. & Barlow, D.P. Bidirectional action of the Igf2r imprint control element on upstream and downstream imprinted genes. *Genes Dev* **15**, 2361-6 (2001).
13. Yamasaki, K. et al. Neurons but not glial cells show reciprocal imprinting of sense and antisense transcripts of Ube3a. *Hum Mol Genet* **12**, 837-47 (2003).
14. Chamberlain, S.J. & Brannan, C.I. The Prader-Willi syndrome imprinting center activates the paternally expressed murine Ube3a antisense transcript but represses paternal Ube3a. *Genomics* **73**, 316-22 (2001).
15. Herzing, L.B., Kim, S.J., Cook, E.H., Jr. & Ledbetter, D.H. The human aminophospholipid-transporting ATPase gene ATP10C maps adjacent to UBE3A and exhibits similar imprinted expression. *Am J Hum Genet* **68**, 1501-5 (2001).
16. Rougeulle, C. & Heard, E. Antisense RNA in imprinting: spreading silence through Air. *Trends Genet* **18**, 434-7 (2002).
